# Supplementary material for: Reproductive Potential Impacts Body Maintenance Parameters and Global DNA Methylation in Honeybee Workers (Apis mellifera L.)
Source: MDPI journal article supplement (doi:10.3390/insects12111021), 2021-11-12
Supplement: s1 [file s1]

## Supplementary Materials

Table S1. Auxiliary statistics helpful for interpretation of the data which concern the *Nosema* spore load [spore number] and comparison of graphs in Figure 3A, 2B, 2C, 2D.

Explanations: RW and NW – respectively rebel workers and normal workers. day 9, day 11, day 15, day 17, day 19 – statistical interpretation of differences between RW and NW on the e.g. 9<sup>th</sup>, 11<sup>th</sup>, 15<sup>th</sup>, 17<sup>st</sup>, and 19<sup>th</sup> day of the worker life. Read typed – insignificant.

| Environment                                                                 |        | Phenotype | Mean   | SD      | F       | p       |
|-----------------------------------------------------------------------------|--------|-----------|--------|---------|---------|---------|
| Repetition 1<br>NW and RW are mixed<br>within each cage                     | Day 9  | RW        | 10.60  | 5.8356  | 0.04217 | 0.83780 |
|                                                                             |        | NW        | 10.37  | 4.5930  |         |         |
|                                                                             | day 11 | RW        | 16.79  | 6.0496  | 4.7911  | 0.03138 |
|                                                                             |        | NW        | 14.23  | 4.7047  |         |         |
|                                                                             | Day 15 | RW        | 27.65  | 6.2673  | 24.569  | 0.00000 |
|                                                                             |        | NW        | 21.90  | 4.2973  |         |         |
|                                                                             | Day 17 | RW        | 32.37  | 6.2679  | 37.496  | 0.00000 |
|                                                                             |        | NW        | 25.34  | 4.1569  |         |         |
|                                                                             | Day 19 | RW        | 36.18  | 6.1033  | 41.911  | 0.00000 |
|                                                                             |        | NW        | 28.60  | 4.6605  |         |         |
| Repetition 1<br>NW and RW were kept<br>separately within<br>different cages | day 7  | RW        | 3.92   | 4.6271  | 0.08704 | 0.07704 |
|                                                                             |        | NW        | 4.50   | 5.4596  |         |         |
|                                                                             | day 11 | RW        | 13.07  | 6.0753  | 4.4292  | 0.04555 |
|                                                                             |        | NW        | 17.21  | 4.0034  |         |         |
|                                                                             | Day 15 | RW        | 24.84  | 5.9139  | 0.78150 | 0.38511 |
|                                                                             |        | NW        | 26.71  | 5.0600  |         |         |
|                                                                             | Day 17 | RW        | 30.23  | 6.8817  | 0.10016 | 0.75426 |
|                                                                             |        | NW        | 30.92  | 4.3934  |         |         |
| Repetition 1<br>hives                                                       | day 7  | RW        | 0.00   |         |         |         |
|                                                                             |        | NW        | 0.00   |         |         |         |
|                                                                             | day 9  | RW        | 5.66   | 6.6583  | 27.112  | 0.00649 |
|                                                                             |        | NW        | 32.66  | 6.0277  |         |         |
|                                                                             | Day 17 | RW        | 27.33  | 2.5166  | 64.059  | 0.00132 |
|                                                                             |        | NW        | 49.33  | 4.0414  |         |         |
|                                                                             | Day 33 | RW        | 55.66  | 15.3948 | 6.5146  | 0.05005 |
|                                                                             |        | NW        | 82.00  | 9.0737  |         |         |
|                                                                             | Day 45 | RW        | 74.66  | 21.3853 | 3.2848  | 0.14415 |
|                                                                             |        | NW        | 100.33 | 12.0138 |         |         |
| Repetition 2<br>NW and RW are mixed<br>within each cage                     | day 7  | RW        | 0.00   |         |         |         |
|                                                                             |        | NW        | 0.00   |         |         |         |
|                                                                             | Day 9  | RW        | 0.00   |         | 1.6275  | 0.21253 |
|                                                                             |        | NW        | 1.13   | 3.4406  |         |         |
|                                                                             | Day 11 | RW        | 3.40   | 7.2571  | 16.626  | 0.00034 |
|                                                                             |        | NW        | 11.33  | 2.0283  |         |         |
|                                                                             | Day 17 | RW        | 19.20  | 7.8540  | 18.453  | 0.00019 |
|                                                                             |        | NW        | 29.40  | 4.7839  |         |         |
|                                                                             | Day 31 | RW        | 41.73  | 9.1936  | 14.458  | 0.00071 |
|                                                                             |        | NW        | 52.66  | 6.2845  |         |         |
| Repetition 2                                                                | Day 7  | RW        | 0.13   | 0.5163  | 5.4935  | 0.02641 |
|                                                                             |        | NW        | 1.40   | 2.0283  |         |         |

|                                                       |        |    |       |         |         |         |
|-------------------------------------------------------|--------|----|-------|---------|---------|---------|
| NW and RW were kept separately within different cages | Day 9  | RW | 2.66  | 4.4347  | 5.3094  | 0.02884 |
|                                                       |        | NW | 6.80  | 5.3478  |         |         |
|                                                       | Day 15 | RW | 19.93 | 12.360  | 1.0191  | 0.32138 |
|                                                       |        | NW | 23.46 | 5.5660  |         |         |
|                                                       | Day 17 | RW | 26.33 | 11.1333 | 0.20115 | 0.65725 |
|                                                       |        | NW | 27.73 | 4.7126  |         |         |
|                                                       | Day 23 | RW | 39.46 | 9.4556  | 0.24335 | 0.62564 |
|                                                       |        | NW | 40.80 | 4.4912  |         |         |
|                                                       | Day 29 | RW | 53.53 | 9.2339  | 0.20000 | 0.65816 |
|                                                       |        | NW | 52.26 | 5.9217  |         |         |
|                                                       | Day 33 | RW | 60.33 | 8.2779  | 1.1207  | 0.29881 |
|                                                       |        | NW | 57.53 | 6.0340  |         |         |
| Repetition 2 hives                                    | Day 7  | RW | 15.00 | 9.4162  | 2.5881  | 0.15880 |
|                                                       |        | NW | 6.50  | 4.7958  |         |         |
|                                                       | Day 17 | RW | 41.50 | 7.5938  | 5.0888  | 0.06492 |
|                                                       |        | NW | 31.25 | 4.9916  |         |         |
|                                                       | Day 29 | RW | 65.50 | 9.1104  | 3.8278  | 0.09817 |
|                                                       |        | NW | 48.50 | 14.7986 |         |         |
|                                                       | Day 35 | RW | 77.25 | 12.3389 | 3.9452  | 0.09420 |
|                                                       |        | NW | 59.75 | 12.5797 |         |         |
|                                                       | Day 37 | RW | 82.25 | 9.5000  | 4.3059  | 0.08330 |
|                                                       |        | NW | 63.50 | 15.3731 |         |         |
|                                                       | Day 41 | RW | 89.00 | 8.67947 | 2.5080  | 0.17412 |
|                                                       |        | NW | 71.33 | 20.5020 |         |         |

Table S2. Auxiliary statistics helpful for interpretation of data in Figure 4A, 4B; differences between RW and NW.

Explanations: RW and NW – respectively rebel workers and normal workers. Ovariole no. – number of the worker ovarioles on average. DNA methyl. (%) – percentage of the global DNA methylation (methylated cytosines) on average. DNA methyl. weight – weight of the methylated DNA cytosines [ng]

| Trait and environment                               |                       | Phenotype | Mean     | SD       | F        | p      |
|-----------------------------------------------------|-----------------------|-----------|----------|----------|----------|--------|
| Ovariole no._cages<br>RW and NW mixed in a cage     |                       | RW        | 13.20833 | 0.041074 | 21224.00 | 0.0000 |
|                                                     |                       | NW        | 4.74776  | 0.041057 |          |        |
| Ovariole no._cages<br>RW and NW in a separate cages |                       | RW        | 12.35893 | 0.056625 | 9595.20  | 0.0000 |
|                                                     |                       | NW        | 4.67549  | 0.054279 |          |        |
| Ovariole_3_hives_1-<br>day                          | Ovariole no.          | RW        | 11.90000 | 0.297727 | 211.35   | 0.0000 |
|                                                     |                       | NW        | 5.48000  | 0.326144 |          |        |
|                                                     | DNA methyl.<br>(%)    | RW        | 10.19000 | 0.125247 | 124.06   | 0.0000 |
|                                                     |                       | NW        | 8.12080  | 0.137202 |          |        |
|                                                     | DNA methyl.<br>weight | RW        | 6.46433  | 0.036331 | 407.89   | 0.0000 |
|                                                     |                       | NW        | 5.37600  | 0.039799 |          |        |
| Ovariole_3_hives_7-<br>day                          | Ovariole no.          | RW        | 11.93333 | 0.249671 | 327.69   | 0.0000 |
|                                                     |                       | NW        | 5.42857  | 0.258434 |          |        |
|                                                     | DNA methyl.           | RW        | 12.30500 | 0.015546 | 3066.10  | 0.0000 |

|                             |                       |    |          |          |          |        |
|-----------------------------|-----------------------|----|----------|----------|----------|--------|
|                             | (%)                   | NW | 13.54393 | 0.016092 |          |        |
|                             | DNA methyl.<br>weight | RW | 7.26333  | 0.026139 | 630.81   | 0.0000 |
|                             |                       | NW | 8.20821  | 0.027057 |          |        |
| Ovariole_3_hives_14-<br>day | Ovariole no.          | RW | 12.17241 | 0.245144 | 388.07   | 0.0000 |
|                             |                       | NW | 5.40000  | 0.241024 |          |        |
|                             | DNA methyl.<br>(%)    | RW | 13.04897 | 0.286634 | 46.465   | 0.0000 |
|                             |                       | NW | 15.78900 | 0.281816 |          |        |
|                             | DNA methyl.<br>weight | RW | 10.33172 | 0.122706 | 258.48   | 0.0000 |
|                             |                       | NW | 13.09833 | 0.120644 |          |        |
| Ovariole_3_hives_21-<br>day | Ovariole no.          | RW | 12.16667 | 0.247207 | 400.91   | 0.0000 |
|                             |                       | NW | 5.16667  | 0.247207 |          |        |
|                             | DNA methyl.<br>(%)    | RW | 16.41900 | 0.063110 | 45281.00 | 0.0000 |
|                             |                       | NW | 35.41100 | 0.063110 |          |        |
|                             | DNA methyl.<br>weight | RW | 12.36033 | 0.014571 | 21440.00 | 0.0000 |
|                             |                       | NW | 15.37767 | 0.014571 |          |        |
